# Supplementary material for: Cell Cycle- and Cancer-Associated Gene Networks Activated by Dsg2: Evidence of Cystatin A Deregulation and a Potential Role in Cell-Cell Adhesion
Source: PubMed Central journal article supplement (PMC4364902; doi:10.1371/journal.pone.0120091), 2015-03-18
Supplement: pone.0120091.s005.pdf [file pone.0120091.s005.pdf]

**Table S1. Dsg2-dependent Gene Changes**

| GenBank # | Gene symbol        | Gene Name                                              | p-value | Fold  |
|-----------|--------------------|--------------------------------------------------------|---------|-------|
| NM_021480 | <i>TDH</i>         | L-threonine dehydrogenase                              | 8.1E-03 | 39.18 |
| M92417    | <i>Csta1/Stfa1</i> | Cystatin A1/Stefin A1                                  | 1.7E-02 | 18.39 |
| D45850    | <i>AKR1C4</i>      | Aldo-keto reductase family 1, member C4                | 1.1E-02 | 15.18 |
| AK007978  | Unknown            | Unidentified EST                                       | 3.7E-02 | 14.06 |
| M92419    | <i>Csta3/Stfa3</i> | Cystatin A3/Stefin A3                                  | 1.7E-02 | 12.37 |
| AJ251685  | <i>GPNMB</i>       | Glycoprotein (transmembrane) nmb                       | 9.1E-03 | 9.09  |
| NM_009638 | <i>CRISP3</i>      | Cysteine-rich secretory protein 3                      | 2.9E-02 | 8.79  |
| M83218    | <i>S100A8</i>      | S100 calcium binding protein A8                        | 2.2E-02 | 7.86  |
| AK010010  | Unknown            | Unidentified EST                                       | 4.8E-02 | 7.40  |
| AJ237585  | <i>Ncapg</i>       | Non-SMC condensin I complex, subunit G                 | 1.3E-02 | 7.39  |
| X82786    | <i>MKI67</i>       | Antigen identified by monoclonal antibody Ki-67        | 1.1E-03 | 7.27  |
| AC079832  | Unknown            | Unidentified EST                                       | 4.3E-02 | 7.24  |
| NM_019450 | <i>IL1F6</i>       | Interleukin 1 family, member 6 (epsilon)               | 3.5E-02 | 7.17  |
| NM_026473 | <i>TUBB6</i>       | Tubulin, beta 6                                        | 1.4E-02 | 6.93  |
| AK016955  | Unknown            | Unidentified EST                                       | 3.1E-02 | 6.36  |
| NM_011472 | <i>SPRR2A</i>      | Small proline-rich protein 2A                          | 8.8E-04 | 6.34  |
| NM_007867 | <i>DLX4</i>        | Distal-less homeobox 4                                 | 5.7E-03 | 6.26  |
| NM_009828 | <i>CCNA2</i>       | Cyclin A2                                              | 2.1E-02 | 5.83  |
| Z47778    | <i>TM4SF4</i>      | Transmembrane 4 L six family member 4                  | 1.2E-02 | 5.79  |
| NM_008709 | <i>MYCN</i>        | V-myc myelocytomatosis viral related oncogene          | 2.6E-02 | 5.78  |
| AF002823  | <i>BUB1</i>        | Budding uninhibited by benzimidazoles 1                | 1.0E-02 | 5.73  |
| M92418    | <i>Csta2/Stfa2</i> | Cystatin A2/Stefin A2                                  | 2.6E-02 | 5.71  |
| NM_013707 | <i>Krtap14</i>     | Keratin associated protein 14                          | 2.7E-03 | 5.46  |
| AK021322  | Unknown            | Unidentified EST                                       | 5.3E-03 | 5.40  |
| NM_007630 | <i>CCNB2</i>       | Cyclin B2                                              | 1.7E-02 | 5.40  |
| AK003722  | <i>UBE2C</i>       | Ubiquitin-conjugating enzyme E2C                       | 3.4E-02 | 5.39  |
| NM_011328 | <i>SCT</i>         | Secretin                                               | 6.5E-03 | 4.90  |
| AK003637  | Unknown            | Unidentified EST                                       | 1.2E-02 | 4.81  |
| NM_009689 | <i>BIRC5</i>       | Baculoviral IAP repeat-containing 5                    | 1.8E-02 | 4.79  |
| NM_018815 | <i>NUP210</i>      | Nucleoporin 210 kDa                                    | 1.3E-02 | 4.71  |
| NM_011474 | <i>SPRR2A</i>      | Small proline-rich protein 2A                          | 1.2E-02 | 4.68  |
| NM_026351 | <i>Ttc39d</i>      | Tetratricopeptide repeat domain 39D                    | 2.1E-02 | 4.61  |
| M16449    | <i>MYB</i>         | V-myb myeloblastosis viral oncogene homolog            | 2.3E-02 | 4.59  |
| NM_007629 | <i>CCNB1</i>       | Cyclin B1                                              | 1.7E-02 | 4.59  |
| NM_010790 | <i>MELK</i>        | Maternal embryonic leucine zipper kinase               | 2.6E-02 | 4.50  |
| NM_019641 | <i>STMN1</i>       | Stathmin 1                                             | 1.7E-02 | 4.46  |
| NM_011234 | <i>RAD51</i>       | RAD51 homolog                                          | 6.8E-03 | 4.34  |
| AB041882  | <i>PBK</i>         | PDZ binding kinase                                     | 2.3E-02 | 4.31  |
| NM_010892 | <i>NEK2</i>        | NIMA (never in mitosis gene a)-related kinase 2        | 2.3E-03 | 4.31  |
| NM_016880 | <i>KRT35</i>       | Keratin 35                                             | 3.0E-02 | 4.25  |
| AK002480  | <i>CTH</i>         | Cystathionase (cystathionine gamma-lyase)              | 3.8E-02 | 4.22  |
| U85511    | <i>NME1</i>        | Non-metastatic cells 1, protein (NM23A)                | 1.1E-02 | 4.22  |
| AF305710  | <i>NUSAP1</i>      | Nucleolar and spindle associated protein 1             | 6.9E-03 | 4.19  |
| AK013638  | <i>SLC39A10</i>    | Solute carrier family 39 (zinc transporter), member 10 | 8.6E-03 | 4.12  |
| NM_026507 | <i>ZWILCH</i>      | Zwilch, kinetochore associated                         | 1.1E-02 | 4.11  |
| NM_009114 | <i>S100A9</i>      | S100 calcium binding protein A9                        | 5.0E-02 | 4.08  |
| NM_026410 | <i>CDCA5</i>       | Cell division cycle associated 5                       | 2.0E-02 | 4.02  |
| AK009193  | <i>C2orf54</i>     | Chromosome 2 open reading frame 54                     | 4.0E-02 | 3.99  |
| AK018295  | <i>JAKMIP2</i>     | Janus kinase and microtubule interacting protein 2     | 3.8E-02 | 3.99  |
| NM_021351 | <i>CRYBA4</i>      | Crystallin, beta A4                                    | 2.8E-02 | 3.98  |
| NM_033175 | <i>LCE3B</i>       | Late cornified envelope 3B                             | 5.4E-03 | 3.96  |
| NM_010670 | <i>KRTAP12-2</i>   | Keratin associated protein 12-2                        | 2.3E-02 | 3.94  |
| U36475    | <i>BRCA1</i>       | Breast cancer 1, early onset                           | 1.1E-02 | 3.91  |
| NM_011524 | Unknown            | Unidentified EST                                       | 3.2E-02 | 3.87  |
| NM_010192 | <i>FEM1A</i>       | Fem-1 homolog a                                        | 2.2E-02 | 3.86  |
| NM_016748 | <i>CTPS</i>        | CTP synthase                                           | 4.8E-02 | 3.84  |
| AY029584  | <i>STEAP1</i>      | Six transmembrane epithelial antigen of the prostate 1 | 1.2E-02 | 3.79  |

|           |                   |                                                                                  |          |      |
|-----------|-------------------|----------------------------------------------------------------------------------|----------|------|
| NM_009773 | <i>BUB1B</i>      | Budding uninhibited by benzimidazoles 1 homolog beta                             | 3.4E-04  | 3.78 |
| BC003428  | <i>ASF1B</i>      | ASF1 anti-silencing function 1 homolog B                                         | 7.9E-03  | 3.77 |
| NM_009004 | <i>KIF20A</i>     | Kinesin family member 20A                                                        | 2.2E-02  | 3.77 |
| NM_021099 | <i>KIT</i>        | V-kit Hardy-Zuckerman 4 feline sarcoma viral oncogene                            | 6.2E-03  | 3.73 |
| AK003193  | <i>TTYH2</i>      | Tweety homolog 2                                                                 | 2.4E-02  | 3.71 |
| NM_012012 | <i>EXO1</i>       | Exonuclease 1                                                                    | 4.5E-02  | 3.71 |
| NM_026412 | <i>C15orf23</i>   | Chromosome 15 open reading frame 23                                              | 7.9E-04  | 3.70 |
| NM_008970 | <i>PTH1H</i>      | Parathyroid hormone-like hormone                                                 | 1.7E-02  | 3.64 |
| AK010821  | <i>FAM49A</i>     | Family with sequence similarity 49, member A                                     | 3.3E-02  | 3.60 |
| NM_009579 | <i>SLC30A1</i>    | Solute carrier family 30 (zinc transporter), member 1                            | 2.4E-02  | 3.59 |
| NM_015755 | <i>HUNK</i>       | Hormonally up-regulated Neu-associated kinase                                    | 4.6E-02  | 3.59 |
| AK011279  | <i>C1orf135</i>   | Chromosome 1 open reading frame 135                                              | 1.2E-02  | 3.58 |
| AK009086  | <i>KRTAP26-1</i>  | Keratin associated protein 26-1                                                  | 4.0E-02  | 3.53 |
| NM_008252 | <i>HMGB2</i>      | High-mobility group box 2                                                        | 4.4E-04  | 3.52 |
| NM_011369 | <i>SHCBP1</i>     | SHC SH2-domain binding protein 1                                                 | 1.8E-02  | 3.49 |
| AK010336  | <i>TRIP13</i>     | Thyroid hormone receptor interactor 13                                           | 5.9E-03  | 3.46 |
| U68495    | Unknown           | Unidentified EST                                                                 | 4.6E-03  | 3.42 |
| AY029203  | <i>B3GNT5</i>     | UDP-GlcNAc:betaGal beta-1,3-N-acetylglucosaminyltransferase 5                    | 3.2E-02  | 3.41 |
| NM_011404 | <i>SLC7A5</i>     | Solute carrier family 7, member 5                                                | 3.6E-02  | 3.37 |
| NM_007681 | <i>CENPA</i>      | Centromere protein A                                                             | 5.0E-03  | 3.35 |
| NM_008217 | <i>HAS3</i>       | Hyaluronan synthase 3                                                            | 1.3E-03  | 3.35 |
| NM_008566 | <i>MCM5</i>       | Minichromosome maintenance complex component 5                                   | 1.8E-02  | 3.34 |
| NM_013905 | <i>HEYL</i>       | Hairy/enhancer-of-split related with YRPW motif-like                             | 1.4E-02  | 3.34 |
| NM_021380 | <i>IL20</i>       | Interleukin 20                                                                   | 2.9E-02  | 3.32 |
| U79738    | <i>DLX3</i>       | Distal-less homeobox 3                                                           | 9.7E-03  | 3.26 |
| AB037685  | <i>ANP32E</i>     | Acidic (leucine-rich) nuclear phosphoprotein 32 family, member E                 | 3.4E-02  | 3.23 |
| NM_010665 | Unknown           | Unidentified EST                                                                 | 2.0E-02  | 3.22 |
| M94303    | Unknown           | Unidentified EST                                                                 | 1.1E-02  | 3.19 |
| M30774    | Unknown           | Unidentified EST                                                                 | 2.1E-02  | 3.17 |
| NM_009860 | <i>CDC25C</i>     | Cell division cycle 25 homolog C                                                 | 1.7E-02  | 3.16 |
| NM_021790 | <i>CENPK</i>      | Centromere protein K                                                             | 3.0E-02  | 3.11 |
| NM_009705 | <i>ARG2</i>       | Arginase, type II                                                                | 2.3E-02  | 3.10 |
| NM_016889 | <i>INSM1</i>      | Insulinoma-associated 1                                                          | 2.0E-02  | 3.10 |
| NM_008253 | <i>HMGB3</i>      | High-mobility group box 3                                                        | 1.1E-02  | 3.09 |
| NM_020567 | <i>GMNN</i>       | Geminin, DNA replication inhibitor                                               | 4.0E-02  | 3.09 |
| AK005954  | <i>SYCE2</i>      | Synaptonemal complex central element protein 2                                   | 4.5E-02  | 3.08 |
| AK012894  | <i>ZNF618</i>     | Zinc finger protein 618                                                          | 1.8E-02  | 3.07 |
| AK011728  | <i>SPC24</i>      | SPC24, NDC80 kinetochore complex component                                       | 2.9E-02  | 3.06 |
| J03733    | <i>ODC1</i>       | Ornithine decarboxylase 1                                                        | 4.67E-04 | 3.06 |
| AF053339  | <i>CAD</i>        | Carbamoyl-phosphate synthetase 2, aspartate transcarbamylase, and dihydroorotase | 4.7E-02  | 3.04 |
| NM_013726 | <i>DBF4</i>       | DBF4 homolog                                                                     | 1.1E-02  | 3.03 |
| NM_016692 | <i>INCENP</i>     | Inner centromere protein antigens 135/155kDa                                     | 9.6E-03  | 2.99 |
| NM_012044 | <i>PLA2G2E</i>    | Phospholipase A2, group IIE                                                      | 3.7E-02  | 2.98 |
| AK008278  | <i>CKAP2L</i>     | Cytoskeleton associated protein 2-like                                           | 9.2E-03  | 2.95 |
| NM_013601 | <i>MSX2</i>       | Msh homeobox 2                                                                   | 2.9E-02  | 2.95 |
| NM_019754 | <i>TAGLN3</i>     | Transgelin 3                                                                     | 1.1E-02  | 2.95 |
| D10920    | <i>ZNF618</i>     | Zinc finger protein 618                                                          | 2.6E-02  | 2.91 |
| NM_009028 | <i>Ras12-9-ps</i> | RAS-like, family 2, locus 9, pseudogene                                          | 1.1E-02  | 2.91 |
| AK003555  | <i>SGOL2</i>      | Shugoshin-like 2                                                                 | 1.5E-02  | 2.88 |
| AK004134  | <i>ANLN</i>       | Anillin, actin binding protein                                                   | 2.1E-02  | 2.84 |
| X62154    | <i>MCM3</i>       | Minichromosome maintenance complex component 3                                   | 3.2E-02  | 2.83 |
| NM_007999 | <i>FEN1</i>       | Flap structure-specific endonuclease 1                                           | 1.6E-02  | 2.81 |
| NM_008239 | <i>FOXQ1</i>      | Forkhead box Q1                                                                  | 3.9E-02  | 2.80 |
| NM_008565 | <i>MCM4</i>       | Minichromosome maintenance complex component 4                                   | 4.6E-02  | 2.79 |
| NM_008580 | <i>MAP3K5</i>     | Mitogen-activated protein kinase kinase kinase 5                                 | 3.4E-02  | 2.78 |
| X90779    | Unknown           | Unidentified EST                                                                 | 2.5E-03  | 2.76 |
| NM_009171 | <i>SHMT1</i>      | Serine hydroxymethyltransferase 1 (soluble)                                      | 1.4E-02  | 2.75 |
| AF091101  | <i>DUT</i>        | Deoxyuridine triphosphatase                                                      | 2.8E-02  | 2.74 |
| AK015015  | <i>STEAP2</i>     | Six transmembrane epithelial antigen of the prostate 2                           | 4.1E-03  | 2.74 |

|           |                 |                                                            |          |      |
|-----------|-----------------|------------------------------------------------------------|----------|------|
| NM_021352 | <i>CRYBB3</i>   | Crystallin, beta B3                                        | 4.6E-02  | 2.74 |
| NM_028186 | <i>NKD2</i>     | Naked cuticle homolog 2                                    | 3.6E-02  | 2.73 |
| BC011230  | <i>NT5DC2</i>   | 5'-nucleotidase domain containing 2                        | 8.0E-04  | 2.72 |
| AK021390  | <i>HELLS</i>    | Helicase, lymphoid-specific                                | 2.2E-03  | 2.71 |
| BC003335  | <i>RFC4</i>     | Replication factor C (activator 1) 4, 37kDa                | 4.1E-02  | 2.69 |
| NM_007440 | <i>ALOX12</i>   | Arachidonate 12-lipoxygenase                               | 9.9 E-03 | 2.69 |
| NM_008128 | <i>GJB6</i>     | Gap junction protein, beta 6, 30kDa                        | 4.0E-02  | 2.68 |
| AK009031  | Unknown         | Unidentified EST                                           | 6.3E-04  | 2.64 |
| AK010426  | <i>CDKN3</i>    | Cyclin-dependent kinase inhibitor 3                        | 3.0E-02  | 2.64 |
| NM_009015 | <i>RAD54L</i>   | RAD54-like                                                 | 1.6E-02  | 2.64 |
| AK011596  | <i>TFRC</i>     | Transferrin receptor (p90, CD71)                           | 3.2E-02  | 2.63 |
| AK020710  | Unknown         | Unidentified EST                                           | 3.5E-02  | 2.63 |
| NM_007955 | <i>PTPRV</i>    | Protein tyrosine phosphatase, receptor type, V, pseudogene | 6.1E-03  | 2.63 |
| NM_009128 | <i>Scd2</i>     | Stearoyl-Coenzyme A desaturase 2                           | 1.1E-02  | 2.63 |
| AK009787  | <i>IL1F8</i>    | Interleukin 1 family, member 8 (eta)                       | 3.5E-02  | 2.62 |
| U62922    | <i>HIST1H1B</i> | Histone cluster 1, H1b                                     | 3.1E-03  | 2.62 |
| AK013046  | Unknown         | Unidentified EST                                           | 2.1E-02  | 2.61 |
| NM_016870 | <i>ACSM3</i>    | Acyl-CoA synthetase medium-chain family member 3           | 4.1E-03  | 2.61 |
| U26229    | Unknown         | Unidentified EST                                           | 3.4E-02  | 2.61 |
| AK008384  | Unknown         | Unidentified EST                                           | 2.3E-02  | 2.59 |
| NM_007633 | <i>CCNE1</i>    | Cyclin E1                                                  | 3.3E-03  | 2.59 |
| NM_010715 | <i>LIG1</i>     | Ligase I, DNA, ATP-dependent                               | 3.2E-02  | 2.55 |
| AK009799  | <i>NOP56</i>    | NOP56 ribonucleoprotein homolog                            | 1.6E-02  | 2.53 |
| M62766    | <i>HMGCR</i>    | 3-hydroxy-3-methylglutaryl-CoA reductase                   | 1.9E-02  | 2.53 |
| NM_015774 | <i>ERO1L</i>    | ERO1-like                                                  | 9.4E-04  | 2.52 |
| AK003919  | <i>SP6</i>      | Sp6 transcription factor                                   | 1.5E-02  | 2.51 |
| AK004208  | <i>C1orf128</i> | Chromosome 1 open reading frame 128                        | 1.1E-02  | 2.51 |
| BC005610  | <i>TADA2A</i>   | Transcriptional adaptor 2A                                 | 6.4E-03  | 2.51 |
| NM_021308 | <i>PIWIL2</i>   | Piwi-like 2                                                | 1.6E-03  | 2.50 |
| AK003197  | <i>KTI12</i>    | KTI12 homolog, chromatin associated                        | 3.9E-02  | 2.48 |
| NM_011514 | <i>SUV39H1</i>  | Suppressor of variegation 3-9 homolog 1                    | 1.5E-03  | 2.48 |
| NM_018736 | <i>MRE11A</i>   | MRE11 meiotic recombination 11 homolog A                   | 3.5E-02  | 2.47 |
| AK013659  | <i>ARMC1</i>    | Armadillo repeat containing 1                              | 1.6E-02  | 2.46 |
| NM_026394 | <i>Lcelf</i>    | Late cornified envelope 1F                                 | 1.5E-02  | 2.45 |
| X80433    | <i>CIRH1A</i>   | Cirrhosis, autosomal recessive 1A                          | 1.6E-02  | 2.45 |
| AK012015  | <i>EXOSC1</i>   | Exosome component 1                                        | 2.8E-02  | 2.43 |
| AK014047  | <i>LIPG</i>     | Lipase, endothelial                                        | 2.3E-02  | 2.43 |
| NM_007494 | <i>ASS1</i>     | Argininosuccinate synthase 1                               | 1.8E-03  | 2.42 |
| NM_010074 | <i>DPP4</i>     | Dipeptidyl-peptidase 4                                     | 5.7E-03  | 2.42 |
| AK011410  | <i>FAM54A</i>   | Family with sequence similarity 54, member A               | 2.3E-02  | 2.41 |
| BC005751  | <i>SDAD1</i>    | SDA1 domain containing 1                                   | 1.6E-02  | 2.41 |
| NM_025578 | <i>MRPS25</i>   | Mitochondrial ribosomal protein S25                        | 1.5E-02  | 2.41 |
| NM_008684 | <i>NEO1</i>     | Neogenin 1                                                 | 1.7E-02  | 2.38 |
| NM_011060 | <i>PADI3</i>    | Peptidyl arginine deiminase, type III                      | 4.0E-02  | 2.38 |
| NM_020506 | <i>XPO4</i>     | Exportin 4                                                 | 9.6E-03  | 2.38 |
| U69106    | <i>AURKA</i>    | Aurora kinase A                                            | 1.6E-04  | 2.38 |
| AK004331  | <i>PP1L1</i>    | Peptidylprolyl isomerase (cyclophilin)-like 1              | 3.5E-02  | 2.37 |
| AK012041  | <i>CDT1</i>     | Chromatin licensing and DNA replication factor 1           | 4.8E-02  | 2.37 |
| AK017176  | <i>GTF2H3</i>   | General transcription factor IIIH, polypeptide 3, 34kDa    | 8.3E-03  | 2.37 |
| AK004509  | <i>ASPSCR1</i>  | Alveolar soft part sarcoma chromosome region, candidate 1  | 3.0E-02  | 2.35 |
| NM_018868 | <i>NOP58</i>    | NOP58 ribonucleoprotein homolog                            | 2.0E-02  | 2.35 |
| NM_011391 | <i>SLC16A7</i>  | Solute carrier family 16, member 7                         | 2.3E-02  | 2.34 |
| AY007202  | <i>MUC4</i>     | Mucin 4, cell surface associated                           | 2.0E-02  | 2.32 |
| NM_016710 | <i>HMGN5</i>    | High-mobility group nucleosome binding domain 5            | 3.9E-02  | 2.32 |
| AK004699  | <i>CYP2S1</i>   | Cytochrome P450, family 2, subfamily S, polypeptide 1      | 1.6E-03  | 2.31 |
| NM_008652 | <i>MYBL2</i>    | V-myb myeloblastosis viral oncogene homolog-like 2         | 5.9E-03  | 2.31 |
| NM_010212 | <i>FHL2</i>     | Four and a half LIM domains 2                              | 4.9E-03  | 2.31 |
| NM_018749 | <i>EIF3D</i>    | Eukaryotic translation initiation factor 3, subunit D      | 4.2E-02  | 2.30 |
| NM_026531 | <i>AEN</i>      | Apoptosis enhancing nuclease                               | 9.6E-03  | 2.29 |

|           |                 |                                                                  |         |      |
|-----------|-----------------|------------------------------------------------------------------|---------|------|
| NM_031863 | <i>CENPQ</i>    | Centromere protein Q                                             | 3.7E-02 | 2.29 |
| Z31362    | <i>SRXN1</i>    | Sulfiredoxin 1                                                   | 4.0E-02 | 2.29 |
| AK010786  | <i>TUBB2B</i>   | Tubulin, beta 2B                                                 | 1.1E-03 | 2.28 |
| AK021069  | <i>S100A4</i>   | S100 calcium binding protein A4                                  | 2.2E-02 | 2.28 |
| NM_019800 | <i>ACP6</i>     | Acid phosphatase 6, lysophosphatidic                             | 5.0E-02 | 2.28 |
| NM_020487 | <i>PRSS21</i>   | Protease, serine, 21 (testisin)                                  | 2.2E-02 | 2.28 |
| NM_026041 | <i>RRP15</i>    | Ribosomal RNA processing 15 homolog                              | 1.4E-02 | 2.28 |
| X54327    | <i>EPRS</i>     | Glutamyl-prolyl-tRNA synthetase                                  | 1.7E-02 | 2.28 |
| NM_008062 | <i>G6PD</i>     | Glucose-6-phosphate dehydrogenase                                | 1.9E-02 | 2.26 |
| NM_016924 | <i>RWDD2B</i>   | RWD domain containing 2B                                         | 4.1E-02 | 2.26 |
| NM_019451 | <i>IL1F5</i>    | Interleukin 1 family, member 5 (delta)                           | 2.6E-02 | 2.26 |
| NM_025415 | <i>CKS2</i>     | CDC28 protein kinase regulatory subunit 2                        | 3.3E-02 | 2.25 |
| S70056    | <i>CRYZ</i>     | Crystallin, zeta (quinone reductase)                             | 1.4E-02 | 2.24 |
| X65089    | Unknown         | Unidentified EST                                                 | 3.3E-02 | 2.24 |
| NM_010053 | <i>DLX1</i>     | Distal-less homeobox 1                                           | 3.5E-02 | 2.23 |
| NM_010066 | <i>DNMT1</i>    | DNA (cytosine-5-)-methyltransferase 1                            | 1.2E-02 | 2.22 |
| AK014598  | <i>PEX26</i>    | Peroxisomal biogenesis factor 26                                 | 2.6E-02 | 2.21 |
| AK016519  | <i>CCDC18</i>   | Coiled-coil domain containing 18                                 | 1.6E-03 | 2.21 |
| D14336    | <i>POLRIE</i>   | Polymerase (RNA) I polypeptide E, 53kDa                          | 2.1E-02 | 2.21 |
| NM_007573 | <i>CIQBP</i>    | Complement component 1, q subcomponent binding protein           | 3.9E-03 | 2.21 |
| NM_015782 | <i>SNRPA</i>    | Small nuclear ribonucleoprotein polypeptide A                    | 2.8E-03 | 2.21 |
| NM_016693 | <i>MAP3K6</i>   | Mitogen-activated protein kinase kinase kinase 6                 | 1.5E-02 | 2.21 |
| NM_019468 | <i>G6pd2</i>    | Glucose-6-phosphate dehydrogenase 2                              | 2.6E-02 | 2.21 |
| AK005294  | <i>PRPF31</i>   | PRP31 pre-mRNA processing factor 31 homolog                      | 5.0E-02 | 2.20 |
| NM_016904 | <i>CKS1B</i>    | CDC28 protein kinase regulatory subunit 1B                       | 2.8E-02 | 2.20 |
| NM_026024 | <i>UBE2T</i>    | Ubiquitin-conjugating enzyme E2T (putative)                      | 4.3E-03 | 2.20 |
| AK016940  | <i>FGD6</i>     | FYVE, RhoGEF and PH domain containing 6                          | 2.1E-02 | 2.19 |
| BC013242  | <i>FOS</i>      | FBJ murine osteosarcoma viral oncogene homolog                   | 3.6E-02 | 2.19 |
| NM_010792 | <i>METTL1</i>   | Methyltransferase like 1                                         | 2.9E-02 | 2.19 |
| NM_011239 | <i>RANBP1</i>   | RAN binding protein 1                                            | 3.0E-02 | 2.19 |
| AK012621  | Unknown         | Unidentified EST                                                 | 3.5E-02 | 2.18 |
| NM_009270 | <i>SQLE</i>     | Squalene epoxidase                                               | 1.3E-03 | 2.18 |
| NM_011244 | <i>RARG</i>     | Retinoic acid receptor, gamma                                    | 1.8E-02 | 2.18 |
| NM_013733 | <i>CHAF1A</i>   | Chromatin assembly factor 1, subunit A (p150)                    | 4.2E-02 | 2.18 |
| NM_013903 | <i>MMP20</i>    | Matrix metalloproteinase 20                                      | 3.4E-02 | 2.18 |
| AF075717  | <i>Tiaf2</i>    | TGF-beta1-induced anti-apoptotic factor 2                        | 4.7E-02 | 2.17 |
| AK012157  | Unknown         | Unidentified EST                                                 | 4.9E-02 | 2.17 |
| AK020373  | Unknown         | Unidentified EST                                                 | 3.0E-02 | 2.16 |
| NM_009521 | <i>WNT3</i>     | Wingless-type MMTV integration site family, member 3             | 3.5E-02 | 2.16 |
| U62675    | Unknown         | Unidentified EST                                                 | 1.5E-02 | 2.16 |
| AB025582  | <i>ANP32B</i>   | Acidic (leucine-rich) nuclear phosphoprotein 32 family, member B | 1.2E-02 | 2.15 |
| AF251276  | <i>SERPINI2</i> | Serpin peptidase inhibitor, clade I (pancpin), member 2          | 3.0E-02 | 2.15 |
| AK011162  | <i>DSCC1</i>    | Defective in sister chromatid cohesion 1 homolog                 | 5.5E-03 | 2.15 |
| X53584    | <i>HSPD1</i>    | Heat shock 60kDa protein 1 (chaperonin)                          | 4.8E-03 | 2.15 |
| NM_019412 | <i>PRX</i>      | Periaxin                                                         | 1.3E-02 | 2.14 |
| AF120322  | Unknown         | Unidentified EST                                                 | 4.5E-02 | 2.13 |
| AK002481  | <i>PAQR5</i>    | Progesterin and adipoQ receptor family member V                  | 1.7E-02 | 2.13 |
| AK011820  | <i>FBXO5</i>    | F-box protein 5                                                  | 4.9E-02 | 2.13 |
| BC010981  | <i>BC010981</i> | cDNA sequence BC010981                                           | 2.7E-02 | 2.13 |
| NM_010722 | <i>LMNB2</i>    | Lamin B2                                                         | 4.7E-04 | 2.13 |
| NM_011171 | <i>PROCR</i>    | Protein C receptor, endothelial                                  | 1.7E-02 | 2.13 |
| AB026997  | <i>CAST</i>     | Calpastatin                                                      | 3.5E-02 | 2.12 |
| AB041663  | <i>CCDC86</i>   | Coiled-coil domain containing 86                                 | 8.4E-03 | 2.12 |
| AK004150  | Unknown         | Unidentified EST                                                 | 2.9E-02 | 2.12 |
| AB015613  | <i>SET</i>      | SET nuclear oncogene                                             | 3.6E-02 | 2.11 |
| AK008621  | <i>C11orf90</i> | Chromosome 11 open reading frame 90                              | 1.3E-02 | 2.11 |
| D32137    | <i>OVGP1</i>    | Oviductal glycoprotein 1, 120kDa                                 | 4.7E-02 | 2.11 |
| NM_010364 | <i>GTF2H4</i>   | General transcription factor IIIH, polypeptide 4, 52kDa          | 2.6E-02 | 2.11 |
| NM_030004 | <i>CRYL1</i>    | Crystallin, lambda 1                                             | 2.9E-02 | 2.11 |

|           |                 |                                                                                         |         |       |
|-----------|-----------------|-----------------------------------------------------------------------------------------|---------|-------|
| AK008369  | <i>Snhg8</i>    | Small nucleolar RNA host gene 8                                                         | 1.3E-03 | 2.10  |
| AK012762  | Unknown         | Unidentified EST                                                                        | 4.9E-02 | 2.10  |
| BC003426  | <i>EIF2B1</i>   | Eukaryotic translation initiation factor 2B, subunit 1 alpha                            | 3.5E-02 | 2.10  |
| L36062    | <i>STAR</i>     | Steroidogenic acute regulatory protein                                                  | 3.4E-02 | 2.10  |
| NM_007832 | <i>DCK</i>      | Deoxycytidine kinase                                                                    | 2.0E-02 | 2.10  |
| AK021362  | <i>FAM55D</i>   | Family with sequence similarity 55, member D                                            | 1.7E-02 | 2.09  |
| AB007600  | <i>CYBRD1</i>   | Cytochrome b reductase 1                                                                | 1.3E-02 | 2.08  |
| NM_007691 | <i>CHEK1</i>    | CHK1 checkpoint homolog                                                                 | 4.0E-02 | 2.08  |
| NM_009982 | <i>CTSC</i>     | Cathepsin C                                                                             | 2.3E-02 | 2.08  |
| Y18276    | <i>NBEA</i>     | Neurobeachin                                                                            | 2.0E-02 | 2.08  |
| AK018070  | <i>LPO</i>      | Lactoperoxidase                                                                         | 1.4E-02 | 2.07  |
| NM_008180 | <i>GSS</i>      | Glutathione synthetase                                                                  | 2.6E-02 | 2.07  |
| NM_021336 | <i>SNRPA1</i>   | Small nuclear ribonucleoprotein polypeptide A'                                          | 3.9E-02 | 2.07  |
| NM_025403 | <i>NOP10</i>    | NOP10 ribonucleoprotein homolog                                                         | 4.4E-02 | 2.07  |
| AF293845  | <i>LPAR3</i>    | Lysophosphatidic acid receptor 3                                                        | 4.5E-02 | 2.06  |
| AK020690  | <i>Krtap5-5</i> | Keratin associated protein 5-5                                                          | 5.0E-02 | 2.06  |
| NM_011568 | <i>THOC4</i>    | THO complex 4                                                                           | 2.8E-02 | 2.06  |
| NM_016777 | <i>NASP</i>     | Nuclear autoantigenic sperm protein (histone-binding)                                   | 1.2E-02 | 2.06  |
| NM_009088 | <i>POLR1A</i>   | Polymerase (RNA) I polypeptide A, 194kDa                                                | 2.2E-03 | 2.05  |
| NM_016788 | <i>TNK2</i>     | Tyrosine kinase, non-receptor, 2                                                        | 2.1E-02 | 2.05  |
| NM_019740 | <i>FOXO3</i>    | Forkhead box O3                                                                         | 3.7E-02 | 2.05  |
| AK012340  | <i>NMRAL1</i>   | NmrA-like family domain containing 1                                                    | 4.3E-02 | 2.04  |
| NM_007926 | <i>AIMP1</i>    | Aminoacyl tRNA synthetase complex-interacting multifunctional protein 1                 | 2.9E-03 | 2.04  |
| NM_008424 | <i>KCNE1</i>    | Potassium voltage-gated channel, Isk-related family, member 1                           | 2.7E-02 | 2.04  |
| NM_011131 | <i>POLD1</i>    | Polymerase (DNA directed), delta 1, catalytic subunit 125kDa                            | 1.5E-02 | 2.04  |
| AF343088  | <i>KRT75</i>    | Keratin 75                                                                              | 1.7E-02 | 2.03  |
| AK018333  | <i>PWP2</i>     | PWP2 periodic tryptophan protein homolog                                                | 3.3E-02 | 2.03  |
| NM_008300 | <i>HSPA4</i>    | Heat shock 70 kDa protein 4                                                             | 2.7E-04 | 2.03  |
| NM_008893 | <i>POLA2</i>    | Polymerase (DNA directed), alpha 2 (70 kD subunit)                                      | 3.9E-03 | 2.02  |
| AB003502  | <i>GSPT1</i>    | G1 to S phase transition 1                                                              | 1.6E-02 | 2.01  |
| AK002371  | <i>SNRNP40</i>  | Small nuclear ribonucleoprotein 40 kDa (U5)                                             | 1.1E-02 | 2.01  |
| AK010531  |                 | Unidentified EST                                                                        | 3.3E-02 | 2.01  |
| AK011725  | <i>APITD1</i>   | Apoptosis-inducing, TAF9-like domain 1                                                  | 2.3E-03 | 2.01  |
| NM_009104 | <i>RRM2</i>     | Ribonucleotide reductase M2                                                             | 4.7E-02 | 2.01  |
| NM_015765 | <i>HSPA14</i>   | Heat shock 70kDa protein 14                                                             | 1.7E-02 | 2.01  |
| NM_015781 | <i>NAPIL1</i>   | Nucleosome assembly protein 1-like 1                                                    | 2.1E-02 | 2.01  |
| NM_020603 | <i>WDR46</i>    | WD repeat domain 46                                                                     | 3.6E-03 | 2.01  |
| NM_021448 | <i>ELP2</i>     | Elongation protein 2 homolog                                                            | 1.0E-02 | 2.01  |
| NM_023136 | <i>DTYMK</i>    | Deoxythymidylate kinase (thymidylate kinase)                                            | 3.2E-02 | 2.01  |
| NM_026306 | <i>TRMT112</i>  | tRNA methyltransferase 11-2 homolog                                                     | 6.1E-03 | 2.01  |
| NM_011304 | <i>RUVBL2</i>   | RuvB-like 2                                                                             | 8.8E-03 | 2.00  |
| NM_025424 | <i>NENF</i>     | Neuron derived neurotrophic factor                                                      | 8.0E-03 | -2.00 |
| AK011423  | <i>GNS</i>      | Glucosamine (N-acetyl)-6-sulfatase                                                      | 5.0E-03 | -2.01 |
| Z31360    | Unknown         | Unidentified EST                                                                        | 2.3E-02 | -2.01 |
| NM_007628 | <i>CCNA1</i>    | Cyclin A1                                                                               | 2.9E-02 | -2.02 |
| AF398966  | <i>ASB5</i>     | Ankyrin repeat and SOCS box-containing 5                                                | 4.3E-02 | -2.03 |
| AK019470  | <i>GALNTL2</i>  | UDP-N-acetyl-alpha-D-galactosamine:polypeptide N-acetylgalactosaminyltransferase-like 2 | 3.9E-02 | -2.03 |
| NM_013630 | <i>PKD1</i>     | Polycystic kidney disease 1 (autosomal dominant)                                        | 1.5E-02 | -2.03 |
| M33425    | <i>JAK1</i>     | Janus kinase 1                                                                          | 1.7E-02 | -2.04 |
| NM_008495 | <i>LGALS1</i>   | Lectin, galactoside-binding, soluble, 1                                                 | 3.3E-02 | -2.04 |
| NM_008816 | <i>PECAMI</i>   | Platelet/endothelial cell adhesion molecule                                             | 3.0E-02 | -2.04 |
| NM_016985 | <i>MTMR1</i>    | Myotubularin related protein 1                                                          | 9.3E-03 | -2.04 |
| NM_025425 | <i>RPL3L</i>    | Ribosomal protein L3-like                                                               | 3.1E-02 | -2.04 |
| AF373409  | <i>Cd209b</i>   | CD209b antigen                                                                          | 2.9E-02 | -2.05 |
| AK009522  | <i>C9orf25</i>  | Chromosome 9 open reading frame 25                                                      | 5.0E-02 | -2.05 |
| NM_010449 | <i>HOXA1</i>    | Homeobox A1                                                                             | 1.6E-03 | -2.05 |
| NM_026514 | <i>CDC42EP3</i> | CDC42 effector protein (Rho GTPase binding) 3                                           | 1.8E-02 | -2.06 |
| NM_031255 | <i>RSPH6A</i>   | Radial spoke head 6 homolog A (Chlamydomonas)                                           | 1.6E-02 | -2.06 |

|           |                   |                                                                   |         |       |
|-----------|-------------------|-------------------------------------------------------------------|---------|-------|
| U12147    | <i>LAMA2</i>      | Laminin, alpha 2                                                  | 4.5E-02 | -2.06 |
| BC012232  | <i>SIPR5</i>      | Sphingosine-1-phosphate receptor 5                                | 1.5E-02 | -2.07 |
| NM_016872 | <i>VAMP5</i>      | Vesicle-associated membrane protein 5 (myobrevin)                 | 3.1E-02 | -2.07 |
| AK018685  | <i>TTC39B</i>     | Tetratricopeptide repeat domain 39B                               | 3.6E-02 | -2.08 |
| AY042200  | <i>MRGPRX1</i>    | MAS-related GPR, member X1                                        | 2.8E-03 | -2.08 |
| BC012207  | Unknown           | Unidentified EST                                                  | 2.4E-02 | -2.08 |
| AF115383  | <i>DST</i>        | Dystonin                                                          | 4.3E-03 | -2.09 |
| BC006062  | <i>ANO1</i>       | Anoctamin 1, calcium activated chloride channel                   | 2.0E-02 | -2.09 |
| NM_010231 | <i>FMO1</i>       | Flavin containing monooxygenase 1                                 | 1.8E-02 | -2.09 |
| NM_021371 | <i>CALN1</i>      | Calneuron 1                                                       | 2.0E-02 | -2.09 |
| AF322069  | <i>TNFRSF21</i>   | Tumor necrosis factor receptor superfamily, member 21             | 1.9E-02 | -2.10 |
| NM_008768 | <i>ORM1/ORM2</i>  | Orosomucoid 1                                                     | 2.2E-02 | -2.11 |
| AK004559  | <i>CPNE8</i>      | Copine VIII                                                       | 4.3E-02 | -2.12 |
| AK018343  | <i>SYT11</i>      | Synaptotagmin XI                                                  | 2.6E-02 | -2.12 |
| AK019934  | <i>CNRIP1</i>     | Cannabinoid receptor interacting protein 1                        | 4.0E-03 | -2.12 |
| NM_008764 | <i>TNFRSF11B</i>  | Tumor necrosis factor receptor superfamily, member 11b            | 8.6E-03 | -2.12 |
| NM_010361 | <i>GST2/GST2B</i> | Glutathione S-transferase theta 2                                 | 3.1E-02 | -2.12 |
| NM_019919 | <i>LTBP1</i>      | Latent transforming growth factor beta binding protein 1          | 1.0E-02 | -2.12 |
| NM_019965 | <i>DNAJB12</i>    | DnaJ (Hsp40) homolog, subfamily B, member 12                      | 4.9E-02 | -2.12 |
| U50959    | <i>PLCB4</i>      | Phospholipase C, beta 4                                           | 3.9E-03 | -2.12 |
| AK009757  | <i>PIR</i>        | Pirin (iron-binding nuclear protein)                              | 1.2E-02 | -2.13 |
| AK009847  | <i>PRSS23</i>     | Protease, serine, 23                                              | 3.4E-02 | -2.13 |
| AK012007  | Unknown           | Unidentified EST                                                  | 3.0E-03 | -2.13 |
| NM_008505 | <i>LMO2</i>       | LIM domain only 2 (rhombotin-like 1)                              | 1.3E-03 | -2.13 |
| NM_008867 | <i>PLA2R1</i>     | Phospholipase A2 receptor 1, 180kDa                               | 7.9E-03 | -2.13 |
| BC006619  | Unknown           | Unidentified EST                                                  | 2.6E-02 | -2.14 |
| AF414190  | <i>SLC35B2</i>    | Solute carrier family 35, member B2                               | 4.8E-02 | -2.15 |
| AK007469  | <i>ABHD14B</i>    | Abhydrolase domain containing 14B                                 | 1.3E-03 | -2.15 |
| AK010042  | <i>SPINK5</i>     | Serine peptidase inhibitor, Kazal type 5                          | 1.5E-02 | -2.15 |
| AK015409  | Unknown           | Unidentified EST                                                  | 4.1E-02 | -2.15 |
| NM_008885 | <i>PMP22</i>      | Peripheral myelin protein 22                                      | 3.6E-02 | -2.15 |
| AF133093  | Unknown           | Unidentified EST                                                  | 3.8E-02 | -2.16 |
| AF161262  | <i>TFAP4</i>      | Transcription factor AP-4 (activating enhancer binding protein 4) | 2.0E-02 | -2.16 |
| AK004726  | <i>LYVE1</i>      | Lymphatic vessel endothelial hyaluronan receptor 1                | 3.7E-02 | -2.16 |
| AK005457  | <i>CBX7</i>       | Chromobox homolog 7                                               | 1.9E-02 | -2.16 |
| NM_008908 | <i>PPIC</i>       | Peptidylprolyl isomerase C (cyclophilin C)                        | 3.6E-02 | -2.16 |
| BC006902  | <i>SLC46A3</i>    | Solute carrier family 46, member 3                                | 3.0E-02 | -2.17 |
| AL357453  | <i>EID1</i>       | EP300 interacting inhibitor of differentiation 1                  | 3.5E-02 | -2.18 |
| BC005485  | <i>OLFML3</i>     | Olfactomedin-like 3                                               | 2.0E-02 | -2.18 |
| NM_020265 | <i>DKK2</i>       | Dickkopf homolog 2                                                | 1.0E-02 | -2.18 |
| AK004365  | Unknown           | Unidentified EST                                                  | 9.0E-04 | -2.19 |
| AK018282  | <i>FAM81A</i>     | Family with sequence similarity 81, member A                      | 1.0E-02 | -2.19 |
| X65506    | <i>KRT36</i>      | Keratin 36                                                        | 1.6E-02 | -2.20 |
| AK007436  | <i>ADAMTS9</i>    | ADAM metallopeptidase with thrombospondin type 1 motif, 9         | 4.6E-03 | -2.21 |
| AK010208  | <i>APOL6</i>      | Apolipoprotein L, 6                                               | 2.7E-02 | -2.21 |
| AK014014  | Unknown           | Unidentified EST                                                  | 2.6E-03 | -2.21 |
| AK015592  | Unknown           | Unidentified EST                                                  | 4.2E-02 | -2.22 |
| NM_020591 | Unknown           | Unidentified EST                                                  | 2.5E-02 | -2.22 |
| AF336850  | <i>Cyp2j9</i>     | Cytochrome P450, family 2, subfamily j, polypeptide 9             | 4.6E-02 | -2.23 |
| AK004681  | <i>TRIL</i>       | TLR4 interactor with leucine-rich repeats                         | 4.8E-02 | -2.23 |
| NM_010630 | <i>KIFC2</i>      | Kinesin family member C2                                          | 2.2E-02 | -2.23 |
| AK020118  | <i>GPC6</i>       | Glypican 6                                                        | 9.5E-03 | -2.24 |
| BC004727  | <i>VWA5A</i>      | Von Willebrand factor A domain containing 5A                      | 4.3E-02 | -2.26 |
| M22479    | <i>TPM1</i>       | Tropomyosin 1 (alpha)                                             | 1.4E-02 | -2.26 |
| M96554    | <i>ALOX5AP</i>    | Arachidonate 5-lipoxygenase-activating protein                    | 8.3E-03 | -2.26 |
| NM_010654 | <i>KLRD1</i>      | Killer cell lectin-like receptor subfamily D, member 1            | 1.1E-02 | -2.26 |
| Z47769    | Unknown           | Unidentified EST                                                  | 5.4E-04 | -2.26 |
| AK013704  | Unknown           | Unidentified EST                                                  | 1.3E-02 | -2.27 |
| BC008560  | <i>SSFA2</i>      | Sperm specific antigen 2                                          | 4.4E-02 | -2.27 |

|           |                 |                                                                                                   |          |       |
|-----------|-----------------|---------------------------------------------------------------------------------------------------|----------|-------|
| NM_008508 | <i>LOR</i>      | Loricrin                                                                                          | 1.1E-02  | -2.27 |
| NM_016687 | <i>SFRP4</i>    | Secreted frizzled-related protein 4                                                               | 4.8E-02  | -2.27 |
| NM_017378 | <i>PCDH12</i>   | Protocadherin 12                                                                                  | 3.6E-02  | -2.27 |
| AF248643  | <i>ACTN2</i>    | Actinin, alpha 2                                                                                  | 5.0E-02  | -2.28 |
| AK003626  | <i>SLC38A4</i>  | Solute carrier family 38, member 4                                                                | 3.6E-03  | -2.28 |
| AK013968  | Unknown         | Unidentified EST                                                                                  | 1.8E-02  | -2.28 |
| NM_020291 | <i>OR5P3</i>    | Olfactory receptor, family 5, subfamily P, member 3                                               | 3.3E-02  | -2.28 |
| AK006564  | Unknown         | Unidentified EST                                                                                  | 9.3E-04  | -2.32 |
| NM_010276 | <i>GEM</i>      | GTP binding protein overexpressed in skeletal muscle                                              | 6.8 E-03 | -2.32 |
| AF235001  | <i>SLC5A5</i>   | Solute carrier family 5 (sodium iodide symporter), member 5                                       | 2.3E-02  | -2.33 |
| NM_010741 | <i>Ly6a</i>     | Lymphocyte antigen 6 complex, locus A                                                             | 1.2E-02  | -2.33 |
| AK002587  | <i>ASPDH</i>    | Aspartate dehydrogenase domain containing                                                         | 7.8E-03  | -2.35 |
| BC010828  | <i>DAP</i>      | Death-associated protein                                                                          | 8.6E-03  | -2.35 |
| NM_009608 | <i>ACTC1</i>    | Actin, alpha, cardiac muscle 1                                                                    | 5.2E-03  | -2.35 |
| NM_010330 | <i>EMB</i>      | Embigin                                                                                           | 2.8E-02  | -2.35 |
| NM_025658 | <i>Ms4a4c</i>   | Membrane-spanning 4-domains, subfamily A, member 4C                                               | 3.6E-02  | -2.35 |
| AK004184  | <i>NEXN</i>     | Nexilin (F actin binding protein)                                                                 | 2.6E-02  | -2.36 |
| J05479    | <i>PPP3CA</i>   | Protein phosphatase 3, catalytic subunit, alpha isozyme                                           | 3.7E-02  | -2.36 |
| NM_027218 | <i>Clec4b1</i>  | C-type lectin domain family 4, member b1                                                          | 1.4E-02  | -2.36 |
| AK010184  | Unknown         | Unidentified EST                                                                                  | 1.7E-02  | -2.37 |
| U20264    | <i>Copg2as2</i> | Coatomer protein complex, subunit gamma 2, antisense 2                                            | 4.1E-03  | -2.37 |
| AK018860  | Unknown         | Unidentified EST                                                                                  | 5.6E-03  | -2.38 |
| NM_021416 | <i>FAM184B</i>  | Family with sequence similarity 184, member B                                                     | 3.1E-02  | -2.38 |
| NM_016894 | <i>RAMP1</i>    | Receptor (G protein-coupled) activity modifying protein 1                                         | 3.7E-02  | -2.39 |
| AK010044  | Unknown         | Unidentified EST                                                                                  | 4.0E-02  | -2.40 |
| NM_007470 | <i>APOD</i>     | Apolipoprotein D                                                                                  | 1.9E-02  | -2.41 |
| NM_013589 | <i>LTBP2</i>    | Latent transforming growth factor beta binding protein 2                                          | 1.4E-02  | -2.41 |
| NM_021472 | <i>RNASE4</i>   | Ribonuclease, RNase A family, 4                                                                   | 4.4E-02  | -2.42 |
| AK017323  | <i>TPRG1</i>    | Tumor protein p63 regulated 1                                                                     | 4.1E-03  | -2.43 |
| NM_007409 | <i>ADH1C</i>    | Alcohol dehydrogenase 1C (class I), gamma polypeptide                                             | 1.6E-02  | -2.43 |
| NM_008969 | <i>PTGS1</i>    | Prostaglandin-endoperoxide synthase 1                                                             | 4.8E-02  | -2.43 |
| NM_023052 | <i>CCL21</i>    | Chemokine (C-C motif) ligand 21                                                                   | 6.9E-03  | -2.43 |
| AK010153  | <i>TTN</i>      | Titin                                                                                             | 2.9E-02  | -2.44 |
| M23013    | <i>TF</i>       | Transferrin                                                                                       | 1.6E-03  | -2.44 |
| NM_021543 | <i>PCDH8</i>    | Protocadherin 8                                                                                   | 4.6E-02  | -2.44 |
| AK003418  | <i>GSTM4</i>    | Glutathione S-transferase mu 4                                                                    | 3.2E-02  | -2.47 |
| NM_008409 | <i>ITM2A</i>    | Integral membrane protein 2A                                                                      | 4.2E-02  | -2.48 |
| AY033514  | <i>BBOX1</i>    | Butyrobetaine (gamma), 2-oxoglutarate dioxygenase (gamma-butyrobetaine hydroxylase) 1             | 2.3E-02  | -2.49 |
| NM_009349 | <i>INMT</i>     | Indolethylamine N-methyltransferase                                                               | 1.4E-02  | -2.50 |
| NM_014193 | <i>CACNA1S</i>  | Calcium channel, voltage-dependent, L type, alpha 1S subunit                                      | 1.2E-02  | -2.51 |
| AK009124  | Unknown         | Unidentified EST                                                                                  | 3.4E-02  | -2.52 |
| AK015595  | Unknown         | Unidentified EST                                                                                  | 1.8E-02  | -2.52 |
| NM_013553 | <i>HOXC4</i>    | Homeobox C4                                                                                       | 4.8E-02  | -2.52 |
| Z25851    | Unknown         | Unidentified EST                                                                                  | 2.1E-02  | -2.53 |
| AK005515  | <i>C3orf59</i>  | Chromosome 3 open reading frame 59                                                                | 3.7E-02  | -2.54 |
| NM_015803 | <i>ATP8A2</i>   | ATPase, aminophospholipid transporter, class I, type 8A, member 2                                 | 2.6E-02  | -2.54 |
| AK004155  | <i>THEM5</i>    | Thioesterase superfamily member 5                                                                 | 3.5 E-02 | -2.56 |
| AK006219  | Unknown         | Unidentified EST                                                                                  | 5.3E-03  | -2.57 |
| NM_010484 | <i>SLC6A4</i>   | Solute carrier family 6, member 4                                                                 | 3.7E-02  | -2.57 |
| AF203899  | <i>NEB</i>      | Nebulin                                                                                           | 3.3E-02  | -2.58 |
| NM_011620 | <i>TNNT3</i>    | Troponin T type 3 (skeletal, fast)                                                                | 3.0E-02  | -2.59 |
| AK016603  | <i>TKTL2</i>    | Transketolase-like 2                                                                              | 1.2E-02  | -2.60 |
| AK017769  | <i>CCDC41</i>   | Coiled-coil domain containing 41                                                                  | 4.6E-02  | -2.60 |
| AK009330  | <i>CLDN23</i>   | Claudin 23                                                                                        | 1.4E-02  | -2.62 |
| BC004653  | <i>SMARCA2</i>  | SWI/SNF related, matrix associated, actin dependent regulator of chromatin, subfamily a, member 2 | 4.0E-02  | -2.62 |
| NM_021422 | <i>DNAJA4</i>   | DnaJ (Hsp40) homolog, subfamily A, member 4                                                       | 4.8E-02  | -2.63 |
| U70380    | Unknown         | Unidentified EST                                                                                  | 8.7E-03  | -2.64 |
| AK010217  | Unknown         | Unidentified EST                                                                                  | 4.6E-02  | -2.65 |

|           |                        |                                                                                 |         |       |
|-----------|------------------------|---------------------------------------------------------------------------------|---------|-------|
| AK003535  | <i>TMEM140</i>         | Transmembrane protein 140                                                       | 1.3E-02 | -2.66 |
| NM_009263 | <i>SPP1</i>            | Secreted phosphoprotein 1                                                       | 1.5E-02 | -2.66 |
| AK003496  | <i>FAM98C</i>          | Family with sequence similarity 98, member C                                    | 9.5E-03 | -2.67 |
| NM_021282 | <i>CYP2E1</i>          | Cytochrome P450, family 2, subfamily E, polypeptide 1                           | 3.1E-02 | -2.67 |
| AB020886  | <i>AKAP12</i>          | A kinase (PRKA) anchor protein 12                                               | 2.8E-02 | -2.69 |
| NM_007421 | <i>ADSSL1</i>          | Adenylosuccinate synthase like 1                                                | 3.2E-02 | -2.69 |
| AY042202  | <i>Mrgprb4/Mrgprb5</i> | MAS-related GPR, member B5                                                      | 1.5E-02 | -2.71 |
| NM_011335 | <i>CCL21</i>           | Chemokine (C-C motif) ligand 21                                                 | 2.2E-02 | -2.72 |
| NM_007728 | <i>COCH</i>            | Coagulation factor C homolog, cochlin ( <i>Limulus polyphemus</i> )             | 2.9E-02 | -2.75 |
| NM_026667 | <i>FAM114A1</i>        | Family with sequence similarity 114, member A1                                  | 3.5E-02 | -2.75 |
| AK014194  | <i>RHOBTB1</i>         | Rho-related BTB domain containing 1                                             | 2.8E-03 | -2.76 |
| AK009197  | <i>APBB2</i>           | Amyloid beta (A4) precursor protein-binding, family B, member 2                 | 2.7E-03 | -2.77 |
| AK013631  | <i>TPPP</i>            | tubulin polymerization promoting protein                                        | 4.3E-02 | -2.77 |
| AK017349  | Unknown                | Unidentified EST                                                                | 1.6E-02 | -2.77 |
| AK021161  | <i>WDR65</i>           | WD repeat domain 65                                                             | 2.0E-03 | -2.81 |
| NM_008455 | <i>KLKB1</i>           | Kallikrein B, plasma (Fletcher factor) 1                                        | 1.1E-02 | -2.81 |
| AK019879  | Unknown                | Unidentified EST                                                                | 2.0E-02 | -2.84 |
| AK009816  | <i>TRDN</i>            | Triadin                                                                         | 1.9E-02 | -2.85 |
| AB048364  | <i>GDPD2</i>           | Glycerophosphodiester phosphodiesterase domain containing 2                     | 1.7E-03 | -2.86 |
| AK019750  | Unknown                | Unidentified EST                                                                | 2.2E-02 | -2.87 |
| NM_009849 | <i>ENTPD2</i>          | Ectonucleoside triphosphate diphosphohydrolase 2                                | 1.1E-02 | -2.87 |
| Z12270    | Unknown                | Unidentified EST                                                                | 7.6E-03 | -2.90 |
| NM_019759 | <i>DPT</i>             | Dermatopontin                                                                   | 1.1E-03 | -2.91 |
| NM_022982 | <i>RTN4R</i>           | Reticulon 4 receptor                                                            | 1.2E-02 | -2.91 |
| NM_009943 | <i>COX6A2</i>          | Cytochrome c oxidase subunit VIa polypeptide 2                                  | 1.1E-02 | -2.92 |
| AK008747  | <i>NFATC1</i>          | Nuclear factor of activated T-cells, cytoplasmic, calcineurin-dependent 1       | 9.8E-03 | -2.93 |
| NM_011281 | <i>RORC</i>            | RAR-related orphan receptor C                                                   | 2.4E-02 | -2.93 |
| NM_007648 | <i>CD3E</i>            | CD3e molecule, epsilon (CD3-TCR complex)                                        | 2.2E-02 | -2.95 |
| NM_008278 | <i>HPGD</i>            | Hydroxyprostaglandin dehydrogenase 15-(NAD)                                     | 3.4E-02 | -2.99 |
| Z95477    | Unknown                | Unidentified EST                                                                | 1.9E-03 | -3.00 |
| NM_013711 | <i>TXNRD2</i>          | Thioredoxin reductase 2                                                         | 3.2E-03 | -3.04 |
| NM_008086 | <i>GAS1</i>            | Growth arrest-specific 1                                                        | 1.6E-02 | -3.05 |
| AK016066  | Unknown                | Unidentified EST                                                                | 3.3E-02 | -3.06 |
| NM_007933 | <i>ENO3</i>            | Enolase 3 (beta, muscle)                                                        | 3.1E-02 | -3.07 |
| AF141322  | <i>CAV2</i>            | Caveolin 2                                                                      | 1.7E-03 | -3.08 |
| NM_008047 | <i>FSTL1</i>           | Follistatin-like 1                                                              | 2.8E-02 | -3.08 |
| AK012513  | Unknown                | Unidentified EST                                                                | 1.9E-02 | -3.09 |
| NM_007813 | <i>Cyp2b13/Cyp2b9</i>  | Cytochrome P450, family 2, subfamily b, polypeptide 9                           | 4.0E-03 | -3.11 |
| NM_011224 | <i>PYGM</i>            | Phosphorylase, glycogen, muscle                                                 | 1.3E-04 | -3.13 |
| NM_011581 | <i>THBS2</i>           | Thrombospondin 2                                                                | 1.3E-02 | -3.13 |
| BC003847  | <i>IL33</i>            | Interleukin 33                                                                  | 4.3E-02 | -3.14 |
| X73020    | Unknown                | Unidentified EST                                                                | 5.1E-03 | -3.15 |
| NM_010555 | <i>IL1R2</i>           | Interleukin 1 receptor, type II                                                 | 1.6E-02 | -3.21 |
| AK003152  | <i>TTN</i>             | Titin                                                                           | 2.6E-02 | -3.27 |
| NM_007453 | <i>PRDX6</i>           | Peroxiredoxin 6                                                                 | 1.0E-02 | -3.27 |
| AK003046  | <i>NRN1</i>            | Neuritin 1                                                                      | 5.5E-03 | -3.28 |
| NM_021508 | <i>MYOZ1</i>           | Myozenin 1                                                                      | 4.9E-02 | -3.29 |
| NM_032541 | <i>HAMP</i>            | Hepcidin antimicrobial peptide                                                  | 1.8E-02 | -3.29 |
| NM_011867 | <i>SLC26A4</i>         | Solute carrier family 26, member 4                                              | 3.2E-02 | -3.36 |
| AK017827  | <i>EIF2C4</i>          | Eukaryotic translation initiation factor 2C, 4                                  | 2.4E-02 | -3.39 |
| NM_010195 | <i>LGR5</i>            | Leucine-rich repeat-containing G protein-coupled receptor 5                     | 3.7E-02 | -3.40 |
| NM_025377 | <i>SKA2</i>            | Spindle and kinetochore associated complex subunit 2                            | 9.5E-03 | -3.41 |
| AJ005051  | <i>Gm10883</i>         | Predicted gene 10883                                                            | 4.8E-02 | -3.47 |
| NM_010758 | <i>MAG</i>             | Myelin associated glycoprotein                                                  | 1.3E-02 | -3.47 |
| NM_010834 | <i>MSTN</i>            | Myostatin                                                                       | 1.8E-02 | -3.65 |
| NM_010244 | <i>Fv1</i>             | Friend virus susceptibility 1                                                   | 4.0E-03 | -3.70 |
| NM_007802 | <i>CTSK</i>            | Cathepsin K                                                                     | 4.6E-02 | -3.88 |
| BC014684  | <i>SLC7A13</i>         | Solute carrier family 7, (cationic amino acid transporter, y+ system) member 13 | 1.1E-02 | -3.95 |



|           |                  |                                                                               |          |        |
|-----------|------------------|-------------------------------------------------------------------------------|----------|--------|
| NM_011580 | <i>THBS1</i>     | Thrombospondin 1                                                              | 4.7E-02  | -4.02  |
| NM_013645 | <i>PVALB</i>     | Parvalbumin                                                                   | 3.8E-03  | -4.17  |
| NM_019548 | <i>TRO</i>       | Trophinin                                                                     | 1.1E-03  | -4.58  |
| AK013470  | Unknown          | Unidentified EST                                                              | 4.5E-03  | -4.64  |
| NM_013467 | <i>ALDH1A1</i>   | Aldehyde dehydrogenase 1 family, member A1                                    | 4.5E-02  | -4.69  |
| NM_019564 | <i>HTRA1</i>     | HtrA serine peptidase 1                                                       | 3.5E-03  | -4.73  |
| NM_009394 | <i>TNNC2</i>     | Troponin C type 2 (fast)                                                      | 7.3E-03  | -4.78  |
| AK009107  | <i>XIRP2</i>     | Xin actin-binding repeat containing 2                                         | 1.8E-02  | -4.88  |
| AK014524  | <i>SERPINB7</i>  | Serpin peptidase inhibitor, clade B (ovalbumin), member 7                     | 8.6E-03  | -4.88  |
| AY042201  | <i>Mrgprb3</i>   | MAS-related GPR, member B3                                                    | 8.8E-03  | -4.89  |
| NM_007538 | <i>OPN1SW</i>    | Opsin 1 (cone pigments), short-wave-sensitive                                 | 1.1E-02  | -4.93  |
| X78885    | <i>HNRNPA1</i>   | Heterogeneous nuclear ribonucleoprotein A1                                    | 2.8E-03  | -4.97  |
| NM_019687 | <i>SLC22A4</i>   | Solute carrier family 22 (organic cation/ergothioneine transporter), member 4 | 2.1E-03  | -5.07  |
| NM_008343 | <i>IGFBP3</i>    | Insulin-like growth factor binding protein 3                                  | 3.4E-03  | -5.24  |
| NM_026535 | <i>SERPINA12</i> | Serpin peptidase inhibitor, clade A (alpha-1 antitrypsin), member 12          | 8.1E-03  | -5.84  |
| NM_008791 | <i>PCP4</i>      | Purkinje cell protein 4                                                       | 3.9E-03  | -6.58  |
| AK019744  | Unknown          | Unidentified EST                                                              | 6.1E-03  | -6.84  |
| AF070470  | <i>SMOC1</i>     | SPARC related modular calcium binding 1                                       | 4.1E-02  | -6.89  |
| NM_007568 | <i>BTC</i>       | Betacellulin                                                                  | 1.0E-02  | -7.75  |
| AK018865  | Unknown          | Unidentified EST                                                              | 1.3E-02  | -8.22  |
| NM_008592 | <i>FOXC1</i>     | Forkhead box C1                                                               | 3.3 E-02 | -8.95  |
| BC014714  | <i>HMGCS2</i>    | 3-hydroxy-3-methylglutaryl-CoA synthase 2 (mitochondrial)                     | 1.3 E-02 | -8.98  |
| NM_013519 | <i>FOXC2</i>     | Forkhead box C2 (MFH-1, mesenchyme forkhead 1)                                | 3.8E-02  | -11.69 |
| AK004289  | Unknown          | Unidentified EST                                                              | 8.3E-03  | -25.73 |
| AK009582  | <i>PBRM1</i>     | Polybromo 1                                                                   | 5.1E-03  | -32.82 |

Complete list of 492 genes modified greater or less than 2 fold in response to Dsg2 expression in transgenic mice.
