# Supplementary material for: Cell Cycle- and Cancer-Associated Gene Networks Activated by Dsg2: Evidence of Cystatin A Deregulation and a Potential Role in Cell-Cell Adhesion
Source: PubMed Central journal article supplement (PMC4364902; doi:10.1371/journal.pone.0120091), 2015-03-18
Supplement: pone.0120091.s006.pdf [file pone.0120091.s006.pdf]

**Table S2. Associated Network Functions**

| <b>Top 5 Gene Networks</b>                                                                 |
|--------------------------------------------------------------------------------------------|
| Gene Expression, Cell Cycle, Cancer                                                        |
| Embryonic Development, Tissue Development, Cancer                                          |
| Cell Cycle, Cancer, Genetic Disorder                                                       |
| Cellular Assembly and Organization, DNA Replication, Recombination, and Repair, Cell Cycle |
| Dermatological Diseases and Conditions, Genetic Disorder, Tissue Morphology                |
