# Supplementary material for: Cell Cycle- and Cancer-Associated Gene Networks Activated by Dsg2: Evidence of Cystatin A Deregulation and a Potential Role in Cell-Cell Adhesion
Source: PubMed Central journal article supplement (PMC4364902; doi:10.1371/journal.pone.0120091), 2015-03-18
Supplement: pone.0120091.s007.pdf [file pone.0120091.s007.pdf]

**Table S3. Changes in Expression of Cell Cycle Genes in Response to Dsg2**

|                                                                                                                                                                                                                                                                                                                                                                                                                      |
|----------------------------------------------------------------------------------------------------------------------------------------------------------------------------------------------------------------------------------------------------------------------------------------------------------------------------------------------------------------------------------------------------------------------|
| <u>G1 Phase and G1/S Transition:</u><br>Camk2a, Camk2b, Gpr132, Itgb1, Mtbp, Myb (C-MYB), <b>Nfatc1 (-2.9)</b> , Ppp2r3a, <b>Ppp3ca (-2.4)</b> , Skp2, Taf10, Slfn1                                                                                                                                                                                                                                                  |
| <u>S Phase and DNA Replication:</u><br>Dnajc2 (Zrf2), Mcm2, <b>Mcm3 (2.8)</b> , <b>Mcm4 (2.8)</b> , <b>Mki67 (7.8)</b> , <b>Mre11a (2.5)</b> , <b>Msh2 (2.9)</b> , Pcna, Rad17, <b>Rad51 (4.3)</b> , Sumo1.                                                                                                                                                                                                          |
| <u>G2 Phase and G2/M Transition:</u><br>Dnajc2 (Zrf2), <b>Chek1 (2.1)</b> , Ppm1d.                                                                                                                                                                                                                                                                                                                                   |
| <u>M Phase:</u><br><b>Brca2 (3.9)</b> , <b>Ccna1 (Cyclin A1, -2.0)</b> , <b>Ccnb1 (4.6)</b> , Cdc25a, Cdc25b, Cdk2, Nek2, Npm2, Pes1, Prm1, Rad21, Ran, Shc1, Smc1a (Smc111), Stag1, Terf1, Tnfsf5ip1, Wee1.                                                                                                                                                                                                         |
| <u>Cell Cycle Checkpoint and Cell Cycle Arrest:</u><br>Ak1, Apbb1, <b>Brca2 (3.9)</b> , Casp3, Cdk5rap1, Cdkn1a, Cdkn1b, Cdkn2a, <b>Chek1 (2.1)</b> , <b>Cks1b (2.1)</b> , Ddit3 (CHOP), <b>Dst (-2.1)</b> , Gadd45a, Hus1, Inha, Macf1, Mad211, Mdm2, <b>Msh2 (2.9)</b> , Notch2, <b>Pkd1 (-2.1)</b> , <b>Pmp22 (-2.1)</b> , Ppm1d (WIP1), Rad9, Sesn2 (Sestrin 2), Sfn (Stratifin), Slfn1, Smc1a (Smc111), Tsg101. |
| <u>Regulation of the Cell Cycle:</u><br>Abl1, Brca2, <b>Ccna1 (-2.0)</b> , <b>Ccna2 (5.8)</b> , <b>Ccnb1 (4.6)</b> , <b>Ccnb2 (5.4)</b> , Ccnc, Ccnd1, <b>Ccne1 (2.6)</b> , Ccnf, Cdk4, Cdkn1a, Cks1b, E2f1, E2f2, E2f3, E2f4, Gadd45a, Itgb1, Rad9, Ran, Sfn (Stratifin), Shc1, Skp2, Tfdp1, Tnfsf5ip1.                                                                                                             |
| <u>Negative Regulation of the Cell Cycle:</u><br>Apbb1, Atm, <b>Brca1 (3.9)</b> , Casp3, Cdkn2a, Inha, Rbl1, Rbl2, Trp53, Trp63.                                                                                                                                                                                                                                                                                     |

Listed are genes known to be involved in different phases of cell cycle regulation. In bold are genes with change greater, or less, than 2 fold in Dsg2 transgenic compared to control wild-type mice and in parentheses are fold change.
